# Supplementary material
Source: publisher figshare collection journal article supplement (https://sage.figshare.com/ndownloader/files/17647544)
Supplement: Supplementary file 1 [file 17647544]

**Appendix C**

*Results for Initial Structural Equation Models with Nonsignificant Paths Included*

| **Affective Responses to Work (Stage 1)** | | | | | | |
| --- | --- | --- | --- | --- | --- | --- |
| Overall Model Fit | | | = 142.233, *p* = 0.0024; RMSEA = 0.054, CI: 0.033, 0.073; CFI = 0.966; TLI = 0.959 | | | |
| Effect | Dependent Factor | | | Regressed onto (Predicted by) | Standardized Coefficient | *p* value (one tailed) |
| Direct | Commitment to Continue Teaching | | | Emotional Exhaustion | 0.725*** | 0.000 |
| Stress | 0.040 | 0.667 |
| Indirect | Stress, via Emotional Exhaustion | 0.189** | 0.002 |
| Workload Manageability, via Emotional Exhaustion and Stress | 0.566*** | 0.000 |
| Direct | Emotional Exhaustion | | | Workload Manageability | 0.612*** | 0.000 |
| Stress | 0.260** | 0.003 |
| Indirect | Workload Manageability, via Stress | 0.139** | 0.002 |
| Direct | Stress | | | Workload Manageability | 0.535*** | 0.000 |
| **Social Resources (Stage 2)** | | | | | | |
| Overall Model Fit | | | = 1235.694, *p* = 0.0000; RMSEA = 0.057, CI: 0.050, 0.064; CFI = 0.895; TLI = 0.887 | | | |
| Effect | Dependent Factor | | | Regressed onto (Predicted by) | Standardized Coefficient | *p* value (one tailed) |
| Direct Effects | Commitment to Continue Teaching | | | Emotional Exhaustion | 0.626*** | 0.000 |
| Administrative Support | 0.294** | 0.001 |
| Indirect Effects | Workload Manageability, via Emotional Exhaustion and Stress | 0.490*** | 0.000 |
| Stress, via Emotional Exhaustion | 0.143** | 0.006 |
| Administrative Support, via Workload Manageability, Stress, and Emotional Exhaustion | 0.168*** | 0.000 |
| Number of Paraprofessionals, via Workload Manageability, Stress, and Emotional Exhaustion | -0.113** | 0.005 |
| Paraprofessional Training, via Workload Manageability and Emotional Exhaustion | 0.209** | 0.003 |
| Direct Effects | Emotional Exhaustion | | | Workload Manageability | 0.657*** | 0.000 |
| Emotional Exhaustion | 0.229** | 0.005 |
| Indirect Effects | Paraprofessional Training, via Workload Manageability | 0.334** | 0.003 |
| Number of Paraprofessionals, via Workload Manageability and Stress | -0.180** | 0.003 |
| Administrative Support, via Workload Manageability and Stress | 0.268** | 0.001 |
| Workload Manageability, via Stress | 0.126** | 0.005 |
| Direct Effects | Stress | | | Workload Manageability | 0.551*** | 0.000 |
| Indirect Effects | Administrative Support, via Workload Manageability and Paraprofessional Training | 0.189** | 0.001 |
| Paraprofessional Training, via Workload Manageability | 0.235** | 0.004 |
| Number of Paraprofessionals, via Workload Manageability | -0.127** | 0.006 |
| Direct Effects | Workload Manageability | | | Administrative Support | 0.206* | 0.033 |
| Collective Responsibility | -0.167 | 0.196 |
| Collaborative Culture | 0.188 | 0.324 |
| Paraprofessional Trust | -0.170 | 0.113 |
| Paraprofessional Training | 0.427** | 0.004 |
| Number of Paraprofessionals | -0.230** | 0.002 |
| Indirect Effects | Administrative Support, via Paraprofessional Training | 0.136* | 0.017 |
| Direct Effects | Collective Responsibility | | | Administrative Support | 0.294** | 0.002 |
| Collaborative Culture | | | 0.422*** | 0.000 |
| Paraprofessional Trust | | | 0.259** | 0.002 |
| Paraprofessional Training | | | 0.351*** | 0.000 |
| **Demands (Stage 4)** | | | | | | |
| Overall Model Fit | | =288.744, *p* = 0.000; RMSEA =0.059, CI: 0.046, 0.071; CFI = 0.931; TLI = 0.920 | | | | |
| Effect | Dependent Factor | | | Regressed onto (Predicted by) | Standardized Coefficient | *p* value (one tailed) |
| Direct | Commitment to Continue Teaching | | | Emotional Exhaustion | 0.748*** | 0.000 |
|  | Stress, via Emotional Exhaustion | 0.201** | 0.001 |
| Indirect | Workload Manageability, via Emotional Exhaustion and Stress | 0.562*** | 0.000 |
| Instructional Grouping, via Workload Manageability, Stress, and Emotional Exhaustion | 0.210* | 0.015 |
| Number of Students, via Workload Manageability, Stress, and Emotional Exhaustion | 0.107** | 0.025 |
| Lessons to Plan, via Workload Manageability, Stress, and Emotional Exhaustion | -0.088* | 0.047 |
| Direct | Emotional Exhaustion | | | Workload Manageability | 0.610*** | 0.000 |
| Stress | 0.269** | 0.001 |
| Indirect | Workload Manageability via Stress | 0.141** | 0.001 |
| Instructional Grouping, via Workload Manageability and Stress | 0.280* | 0.013 |
| Lessons to Plan, via Workload Manageability and Stress | -0.117* | 0.045 |
| Number of Students, via Workload Manageability and Stress | 0.143* | 0.025 |
| Direct | Stress | | | Workload Manageability | 0.525*** | 0.000 |
| Indirect | Instructional Grouping, via Workload Manageability | 0.196* | 0.011 |
| Lessons to Plan, via Workload Manageability | -0.082 | 0.057 |
| Number of Students, via Workload Manageability | 0.100* | 0.023 |
| Direct | Workload Manageability | | | Instructional Grouping | 0.373* | 0.011 |
| Lessons to Plan | -0.156* | 0.043 |
| Number of Students | 0.190* | 0.026 |

* *p* <.05; ** *p* <.01; *** *p* <.001

**Appendix D**

*Results for Retained Structural Equation Models, Stages 1-4 (Figures 1-4), with Nonsignificant Paths Removed*

| **Affective Responses to Work (Stage 1)** | | | | | | |
| --- | --- | --- | --- | --- | --- | --- |
| Model Fit | | | = 142.427, *p* = 0.0028; RMSEA = 0.053, CI: 0.032, 0.072; CFI = 0.967; TLI = 0.960 | | | |
| Effect | Dependent Factor | | | Regressed onto (Predicted by) | Standardized Coefficient | *p* value (one tailed) |
| Direct | Intent to Stay | | | Emot. Exhaustion | 0.750*** | 0.000 |
| Indirect | Stress, via Emotional Exhaustion | 0.197** | 0.002 |
| Work. Manageability, via Emot. Exhaustion & Stress | 0.563*** | 0.000 |
| Direct | Emotional Exhaustion | | | Work. Manageability | 0.610*** | 0.000 |
| Stress | 0.263** | 0.002 |
| Indirect | Work. Manageability, via Stress | 0.141** | 0.002 |
| Direct | Stress | | | Work. Manageability | 0.536*** | 0.000 |
| **Social Resources (Stage 2)** | | | | | | |
| Model Fit | | | = 531.722, *p* = 0.0000; RMSEA = 0.055, CI: 0.045, 0.066; CFI = 0.923; TLI = 0.914 | | | |
| Effect | Dependent Factor | | | Regressed onto (Predicted by) | Standardized Coefficient | *p* value (one tailed) |
| Direct | Intent to Stay | | | Emot. Exhaustion | 0.626*** | 0.000 |
| Administrative Support | 0.292** | 0.001 |
| Indirect | Work. Manageability, via Emot. Exhaustion & Stress | 0.492*** | 0.000 |
| Stress, via Emot. Exhaustion | 0.139** | 0.008 |
| Administrative Support, via Work. Manageability, Stress, & Emot. Exhaustion | 0.167** | 0.001 |
| Number of Paraprofessionals, via Work. Manageability, Stress, & Emot. Exhaustion | -0.113** | 0.005 |
| Parapro. Training, via Work. Manageability & Emot. Exhaustion | 0.146** | 0.003 |
| Direct | Emotional Exhaustion | | | Work. Manageability | 0.663*** | 0.000 |
| Stress | 0.223** | 0.006 |
| Indirect | Parapro. Training, via Work. Manageability | 0.233** | 0.002 |
| Number of Paraprofessionals, via Work. Manageability & Stress | -0.180** | 0.003 |
| Administrative Support, via Work. Manageability & Stress | 0.267** | 0.001 |
| Work. Manageability, via Stress | 0.123** | 0.007 |
| Direct | Stress | | | Work. Manageability | 0.554*** | 0.000 |
| Indirect | Administrative Support, via Work. Manageability & Parapro. Training | 0.188** | 0.001 |
| Parapro. Training, via Work. Manageability | 0.164** | 0.003 |
| Number of Paraprofessionals, via Work. Manageability | -0.127** | 0.006 |
| Direct | Workload Manageability | | | Administrative Support | 0.238* | 0.016 |
| Parapro. Training | 0.297** | 0.003 |
| Number of Paraprofessionals | -0.229** | 0.002 |
| Indirect | Administrative Support, via Parapro. Training | 0.102** | 0.014 |
| Direct | Paraprofessional Training | | | Administrative Support | 0.345*** | 0.000 |
| **Logistical Resources (Stage 3)** | | | | | | |
| Model Fit | =385.195, *p* =0.0000; RMSEA =0.060, CI: 0.048, 0.070; CFI = 0.928; TLI = 0.918 | | | | | |
| Effect | Dependent Factor | | | Regressed onto (Predicted by) | Standardized Coefficient | *p* value (one tailed) |
| Direct | Intent to Stay | | | Emot. Exhaustion | 0.752*** | 0.000 |
| Indirect | Work. Manageability, via Stress & Emot. Exhaustion | 0.564*** | 0.000 |
| Stress, via Emot. Exhaustion | 0.211*** | 0.000 |
| Plan Time, via Work. Manageability, Stress, & Emot. Exhaustion | 0.311*** | 0.000 |
| Hrs Planning, via Work. Manageability, Stress, & Emot. Exhaustion | -0.094*** | 0.000 |
| Curricular Resources, via Work. Manageability & Emot. Exhaustion | 0.130** | 0.003 |
| Direct | Emotional Exhaustion | | | Work. Manageability | 0.608*** | 0.000 |
| Stress | 0.280*** | 0.000 |
|  | Work. Manageability, via Stress | 0.143*** | 0.000 |
| Indirect | Plan Time via Work. Manageability & Stress | 0.414*** | 0.000 |
| Hrs of Planning, via Work. Manageability & Stress | -0.125*** | 0.000 |
| Curricular Resources via Work. Manageability & Stress | 0.173** | 0.003 |
| Direct | Stress | | | Workload Manageability | 0.510*** | 0.000 |
| Indirect | Plan Time, via Work. Manageability | 0.281*** | 0.000 |
| Hrs of Planning, via Work. Manageability | -0.085** | 0.002 |
| Curricular Resources, via Work. Manageability | 0.118** | 0.003 |
| Direct | Workload Manageability | | | Plan Time | 0.552*** | 0.000 |
| Hrs of Planning | -0.166*** | 0.001 |
| Curricular Resources | 0.231** | 0.002 |
| **Demands (Stage 4)** | | | | | | |
| Model Fit | | = 255.454, *p* =0.000; RMSEA = 0.059, CI: 0.045, 0.073; CFI = 0.938; TLI = 0.929 | | | | |
| Effect | Dependent Factor | | | Regressed onto (Predicted by) | Standardized Coefficient | *p* value (one tailed) |
| Direct | Intent to Stay | | | Emot. Exhaustion | 0.749*** | 0.000 |
|  | Stress, via Emot. Exhaustion | 0.200** | 0.001 |
| Indirect | Work. Manageability, via Emot. Exhaustion & Stress | 0.563*** | 0.000 |
| Instructional Group., via Work. Manageability, Stress, & Emot. Exhaustion | 0.173* | 0.041 |
| Lessons to Plan, via Work. Manageability, Stress, & Emot. Exhaustion | -0.093* | 0.030 |
| Direct | Emotional Exhaustion | | | Work. Manageability | 0.611*** | 0.000 |
| Stress | 0.267** | 0.001 |
| Indirect | Work. Manageability via Stress | 0.141** | 0.001 |
| Instructional Group., via Work. Manageability & Stress | 0.230* | 0.037 |
| Lessons to Plan, via Work. Manageability & Stress | -0.125* | 0.029 |
| Direct | Stress | | | Work. Manageability | 0.526*** | 0.000 |
| Indirect | Instructional Group., via Work. Manageability | 0.161* | 0.032 |
| Direct | Workload Manageability | | | Instructional Group. | 0.306* | 0.033 |
| Lessons to Plan | -0.166* | 0.028 |

*Note*. Emot. = Emotional; Work. = Workload; Parapro. = Paraprofessional; Hrs = Hours; Group. = Grouping

* = *p <* .05; ** = *p <* .01; *** = *p <* .001

**Appendix E**

*Results for Full Structural Equation Model with Significant Paths from Stages 1-4, and Non-Significant Paths from Stage 5*

| Overall Model Fit | | =1258.488, *p* = 0.0000; RMSEA = 0.067, CI: 0.060, 0.074; CFI = 0.835; TLI = 0.823 | | | |
| --- | --- | --- | --- | --- | --- |
| Effect | Dependent Factor | | Regressed onto (Predicted by) | Standardized Coefficient | *p* (one tailed) |
| Direct | Intent to Stay | | Emot. Exhaustion | 0.626*** | 0.000 |
| Admin. Support | 0.261** | 0.007 |
| Experience | 0.087 | 0.127 |
| Indirect | Work. Manageability, via Emot. Exhaustion and Stress | 0.476*** | 0.000 |
| Stress, via Emot. Exhaustion | 0.161** | 0.004 |
| Plan Time, via Work. Manageability, Stress and Emot. Exhaustion | 0.273*** | 0.000 |
| Hrs of Planning, via Work. Manageability, Stress and Emot. Exhaustion | -0.066** | 0.006 |
| Admin. Support, via Plan. Time, Work. Manageability Stress, and Emot. Exhaustion | 0.154** | 0.004 |
| Number of Paraprofessionals, via Work. Manageability, Stress, and Emot. Exhaustion | -0.116** | 0.003 |
| Number of Students, via Work. Manageability, Stress, and Emot. Exhaustion |  |  |
| Direct | Emotional Exhaustion | | Work. Manageability | 0.623*** | 0.000 |
| Stress | 0.257** | 0.003 |
| Indirect | Work. Manageability, via Stress | 0.761*** | 0.000 |
| Admin. Support, via Plan Time, Work. Manageability, and Stress | 0.247** | 0.004 |
| Plan. Time, via Work. Manageability, and Stress | 0.437*** | 0.000 |
| Hrs of Planning | -0.105** | 0.007 |
| Number of Paraprofessionals, via Work. Manageability, and Stress | -0.186** | 0.002 |
| Lessons to Plan, via Work. Manageability, and Stress |  |  |
| Direct | Stress | | Work. Manageability | 0.535*** | 0.000 |
| Indirect | Admin. Support, via Plan Time, and Work. Manageability | 0.173** | 0.003 |
| Number of Paraprofessionals, via Work. Manageability | -0.131** | 0.003 |
| Plan Time, via Work. Manageability | 0.307*** | 0.000 |
| Hrs of Planning, via Work. Manageability | -0.074** | 0.009 |
| Direct | Workload Manageability | | Admin. Support | 0.136 | .062 |
| Parapro. Training | 0.088 | 0.181 |
| Number of Paraprofessionals | -0.244*** | 0.000 |
| Plan Time | 0.575*** | 0.000 |
| Curricular Resources | 0.141 | 0.064 |
| Instructional Group. | -0.122ctional | 0.164 |
| Lessons to Plan | -0.034 | 0.310 |
| Hrs of Planning | -0.138** | 0.008 |
| Experience Teaching | 0.075 | 0.178 |
| Indirect | Admin. Support, via Plan Time | 0.188* | 0.021 |
| Direct | Parapro. Training | | Admin. Support | 0.359*** | 0.000 |
| Curricular Resources | | 0.447*** | 0.000 |
| Plan. Time | | 0.211* | 0.045 |
| Instructional Group. | | 0.224 | 0.054 |

*Note*. Emot. = Emotional; Work. = Workload; Parapro. = Paraprofessional; Hrs = Hours; Admin. = Administrative; Group. = Grouping

* *p* <.05; ** *p* <.01; *** *p* <.001

**Appendix F**

*Results for Retained Structural Equation Model, Stage 5 (Figure 6)*

| Overall Model Fit | | =985.336, *p* = 0.0000; RMSEA = 0.069, CI: 0.062, 0.077; CFI = 0.850; TLI = 0.838 | | |
| --- | --- | --- | --- | --- |
| Effect | Dependent Factor | Regressed onto (Predicted by) | Standardized Coefficient | *p* value (one tailed) |
| Direct | Intent to Stay | Emotional Exhaustion | 0.624*** | 0.000 |
| Administrative Support | 0.304*** | 0.000 |
| Indirect | Workload Manageability, via Emotional Exhaustion | 0.490*** | 0.000 |
| Stress, via Emotional Exhaustion | 0.146** | 0.004 |
| Plan Time, via Workload Manageability and Emotional Exhaustion | 0.290*** | 0.000 |
| Administrative Support, via Plan Time, Curricular Resources, Workload Manageability and Emotional Exhaustion | 0.128** | 0.001 |
| Curricular Resources, via Workload Manageability, Stress, and Emotional Exhaustion | 0.084** | 0.008 |
| Instructional Grouping, via Curricular Resources, Plan Time, Workload Manageability and Emotional Exhaustion | 0.166*** | 0.000 |
| Number of Paraprofessionals, via Workload Manageability, Stress and Emotional Exhaustion | -0.125*** | 0.000 |
| Hours of Planning, via Planning Time, Workload Manageability, Stress, and Emotional Exhaustion | -0.142*** | 0.000 |
| Direct | Emotional Exhaustion | Workload Manageability | 0.657*** | 0.000 |
| Stress | 0.234** | 0.004 |
| Indirect | Workload Manageability, via Stress | 0.127** | 0.004 |
| Administrative Support, via Curricular Resources, Plan Time, Workload Manageability, and Stress | 0.205** | 0.001 |
| Plan Time, via Workload Manageability and Stress | 0.464*** | 0.000 |
| Curricular Resources, via Plan Time, Workload Manageability, and Stress | 0.135** | 0.007 |
| Instructional grouping, via Curricular Resources, Plan Time, Workload Manageability, and Stress | 0.266*** | 0.000 |
| Number of Paraprofessionals, via Workload Manageability and Stress | -0.200*** | 0.000 |
| Hours of Planning, via Plan Time, Workload Manageability, and Stress | 0.228*** | 0.000 |
| Direct | Stress | Workload Manageability | 0.415*** | 0.000 |
| Indirect | Plan Time, via Workload Manageability | 0.321*** | 0.000 |
| Number of Paraprofessionals, via Workload Manageability | -0.138*** | 0.000 |
| Hours of Planning, via Plan Time and Workload Manageability | -0.158** | 0.001 |
| Curricular Resources, via Plan Time and Workload Manageability | 0.094** | 0.007 |
| Instructional Grouping, via Curricular Resources, Plan Time, and Workload Manageability | 0.184*** | 0.000 |
| Administrative Support, via Curricular Resources, Planning Time, and Workload Manageability | 0.142** | 0.001 |
| Direct | Workload Manageability | Number of Paraprofessionals | -0.255*** | 0.000 |
| Plan Time | 0.592*** | 0.000 |
| Administrative Support | 0.204** | 0.004 |
| Hours of Planning | -0.160* | 0.010 |
| Indirect | Administrative Support, via Curricular Resources and Plan Time | 0.057* | 0.022 |
| Curricular Resources, via Plan Time | 0.172** | 0.005 |
| Hours of Planning | -0.131** | 0.004 |
| Instructional Grouping, via Curricular Resources and Plan Time | 0.339*** | 0.000 |
| Direct | Plan Time | Instructional Grouping | 0.450*** | 0.000 |
| Curricular Resources | 0.291** | 0.003 |
| Hours of Planning | -0.221** | 0.003 |
| Indirect | Instructional Grouping, via Curricular Resources | 0.122** | 0.005 |
| Administrative Support, via Curricular Resources | 0.096* | 0.019 |
| Direct | Curricular Resources | Administrative Support | 0.330*** | 0.000 |
| Instructional Grouping | 0.418*** | 0.000 |

* *p* <.05; ** *p* <.01; *** *p* <.001
